# Supplementary material for: Mapping global leaf inclination angle (LIA) based on field measurement data
Source: Copernicus journal article supplement (doi:10.5194/essd-17-1347-2025), 2025-04-07
Supplement: Supplementary file 1 [file essd-17-1347-2025-supplement.pdf]

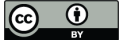

*Supplement of*

## **Mapping global leaf inclination angle (LIA) based on field measurement data**

**Sijia Li and Hongliang Fang**

*Correspondence to:* Sijia Li (lisj.19b@igsnr.ac.cn) and Hongliang Fang (fanghl@reis.ac.cn)

The copyright of individual parts of the supplement might differ from the article licence.

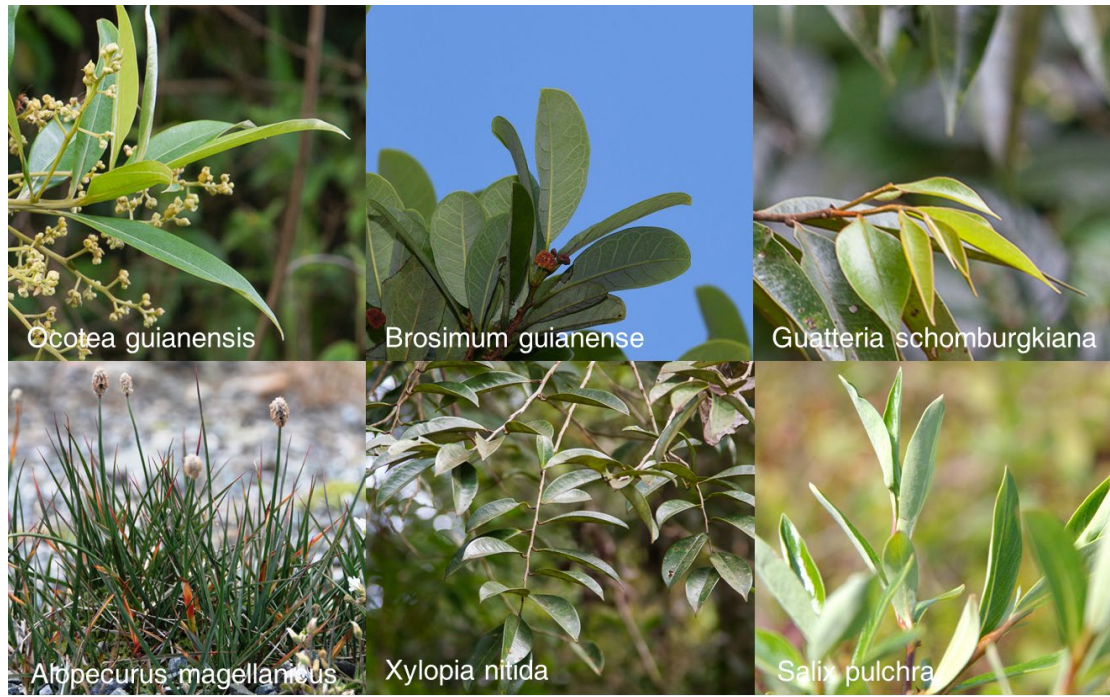

Fig. S1. Leveled digital photography of some plant species.

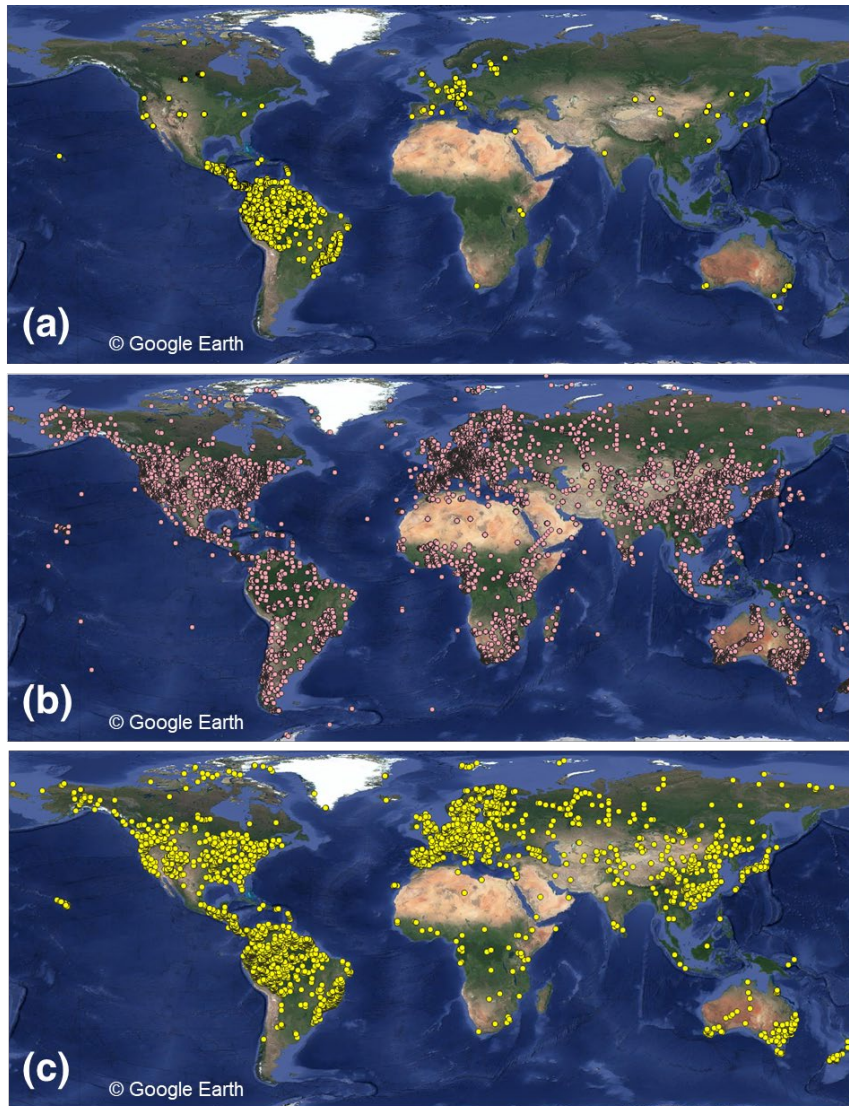

Fig. S2. Spatial distribution of the LIA measurements before (a) and after (c) spatial expansion. (b) shows the TRY species location. Base image from Google Earth.

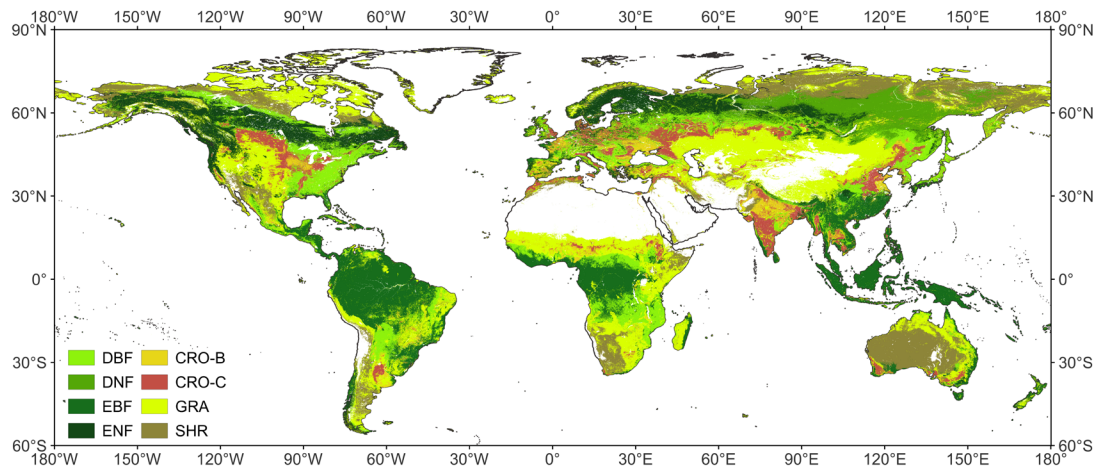

Fig. S3. MODIS plant functional type map aggregated from 2001–2022. DBF: Deciduous broadleaf forest, DNF: Deciduous needleleaf forest, EBF: Evergreen broadleaf forest, ENF: Evergreen needleleaf forest, CRO-B: Broadleaf croplands, CRO-C: Cereal croplands, GRA: Grass, SHR: Shrub.

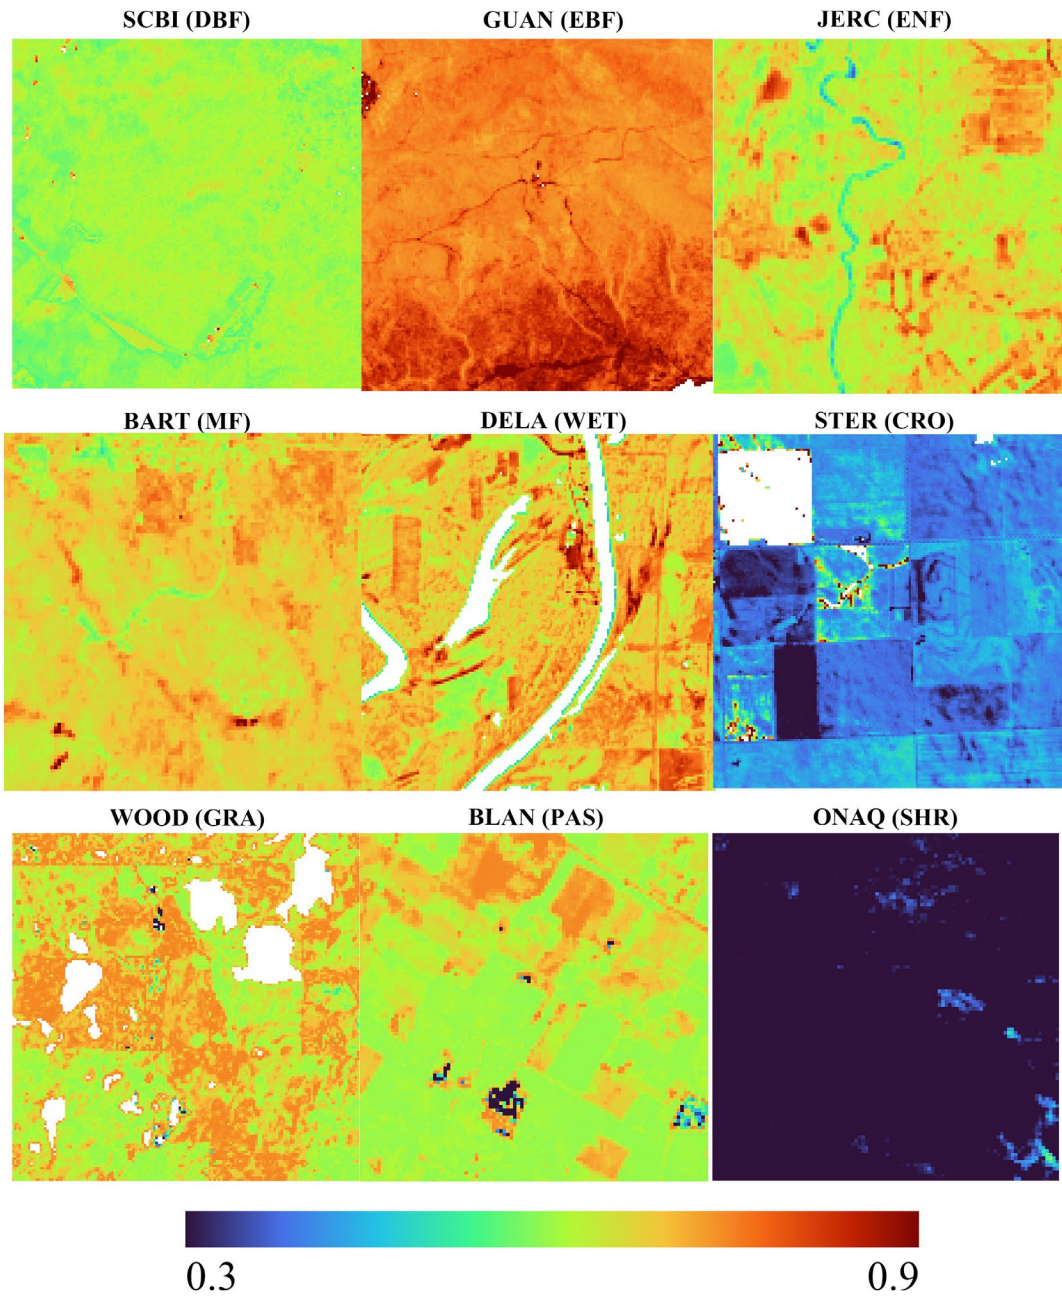

Fig. S4. High-resolution G(0) reference maps for several GBOV sites. Refer to Table S1 for the site information.

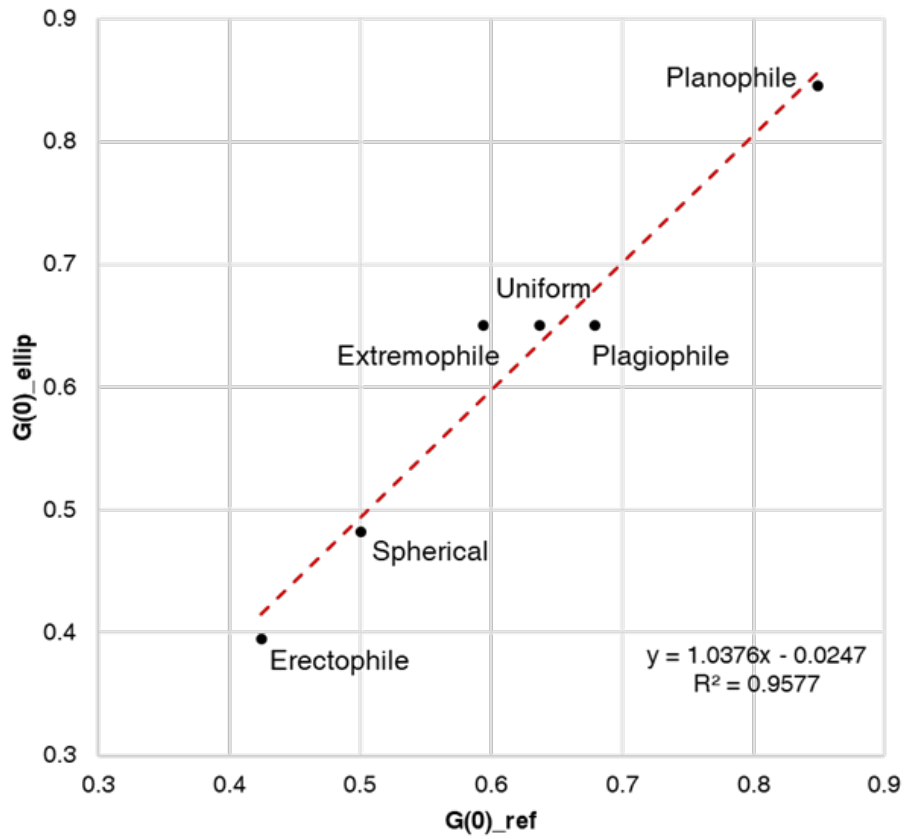

Fig. S5. Comparison of the  $G(0)$  calculated from MLA assuming ellipsoidal LIA distribution ( $G(0)_{\text{ellip}}$ ) and the reference  $G(0)$  ( $G(0)_{\text{ref}}$ ) calculated from the Nilson's algorithm (Nilson, 1971) for six different leaf angle distributions.

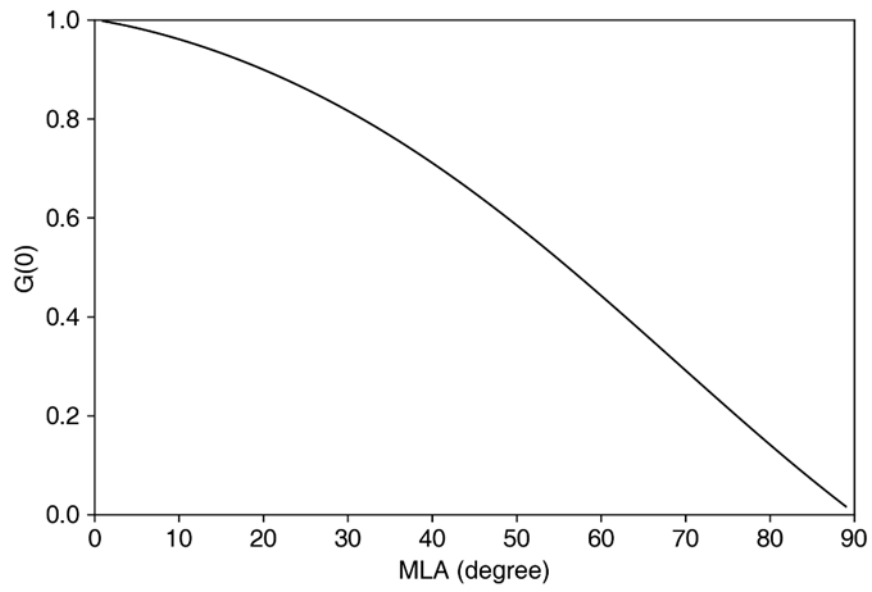

Fig. S6. Variation of  $G(0)$  with MLA assuming an ellipsoidal leaf distribution (Eq. 7).

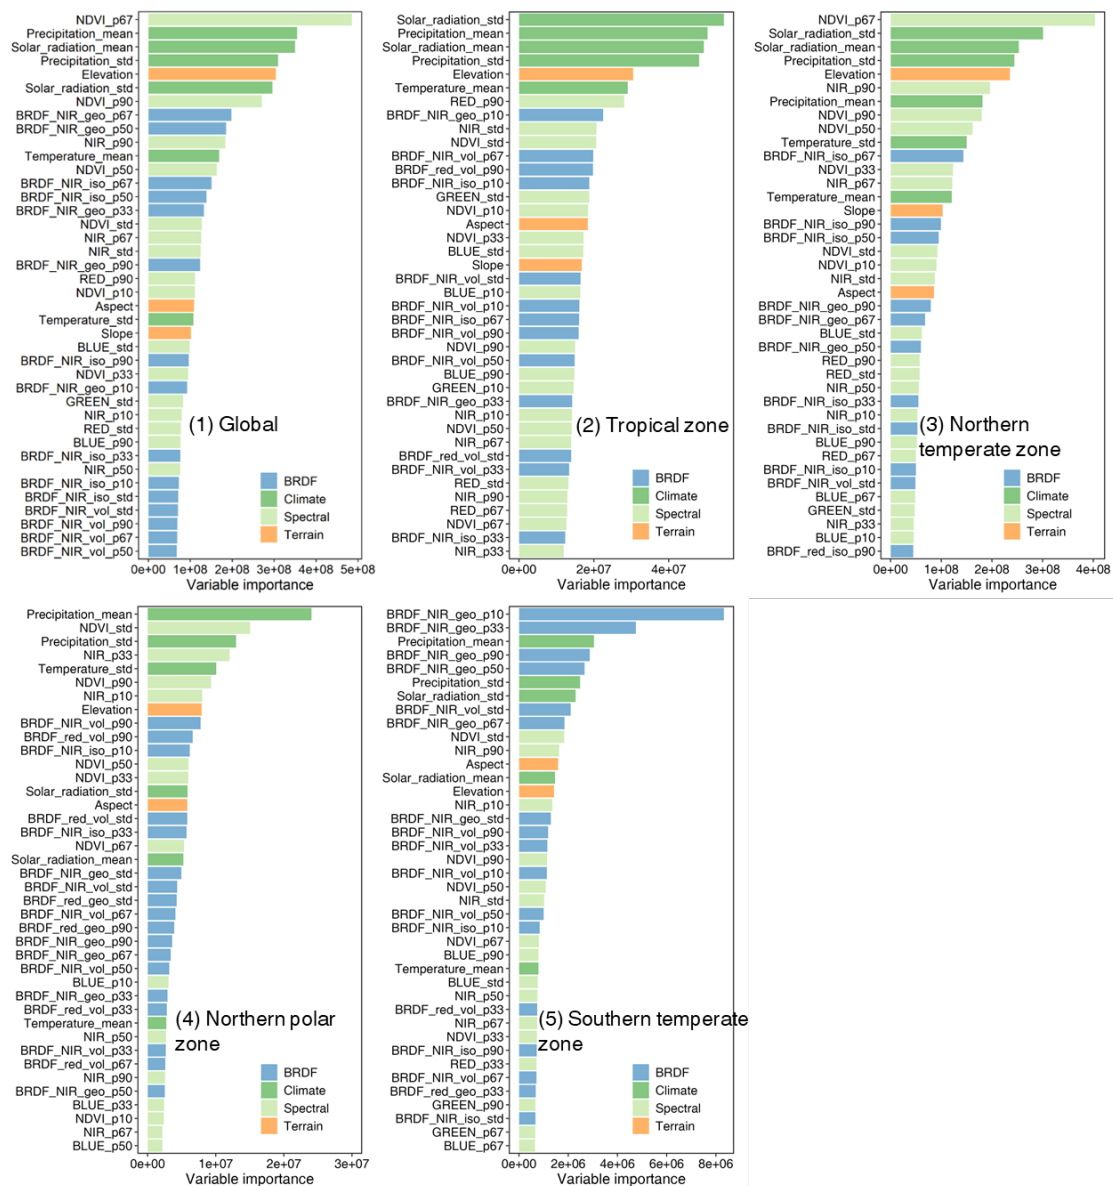

Fig. S7. The variable importance among different climate zones.



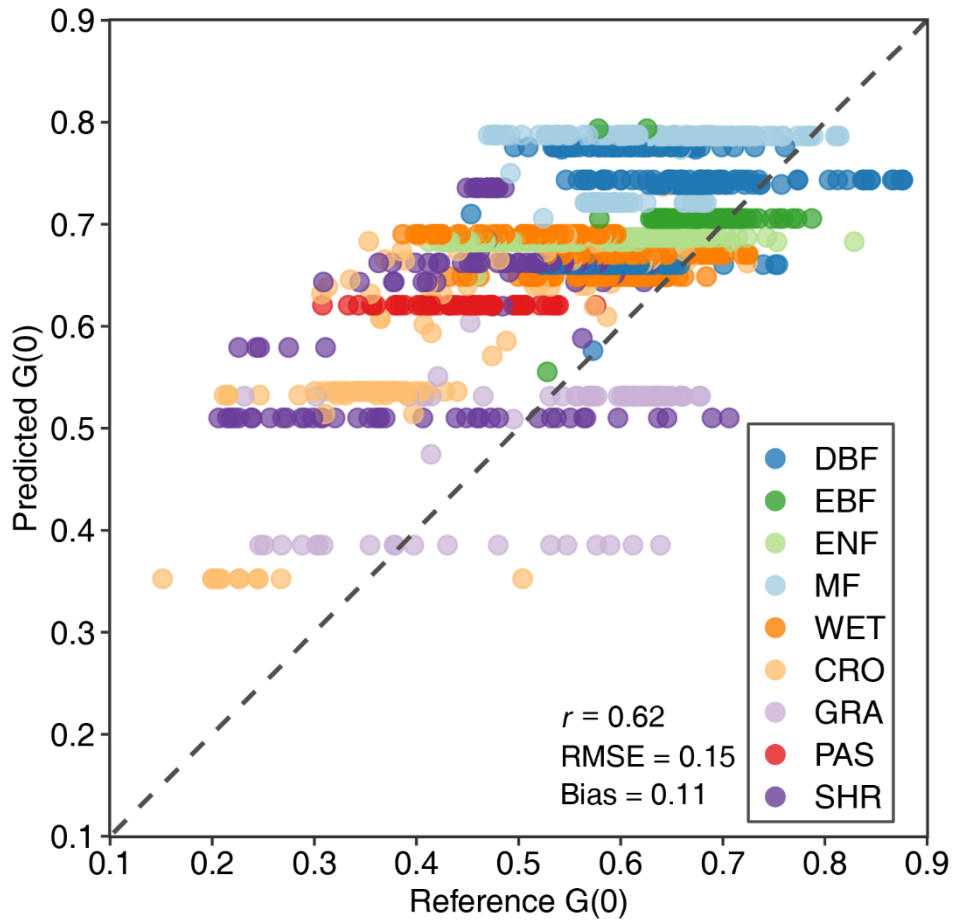

Fig. S8 Comparisons of  $G(0)$  derived from mean leaf inclination angle and high-resolution reference data for different plant functional types (see Fig. 2 for the acronyms).

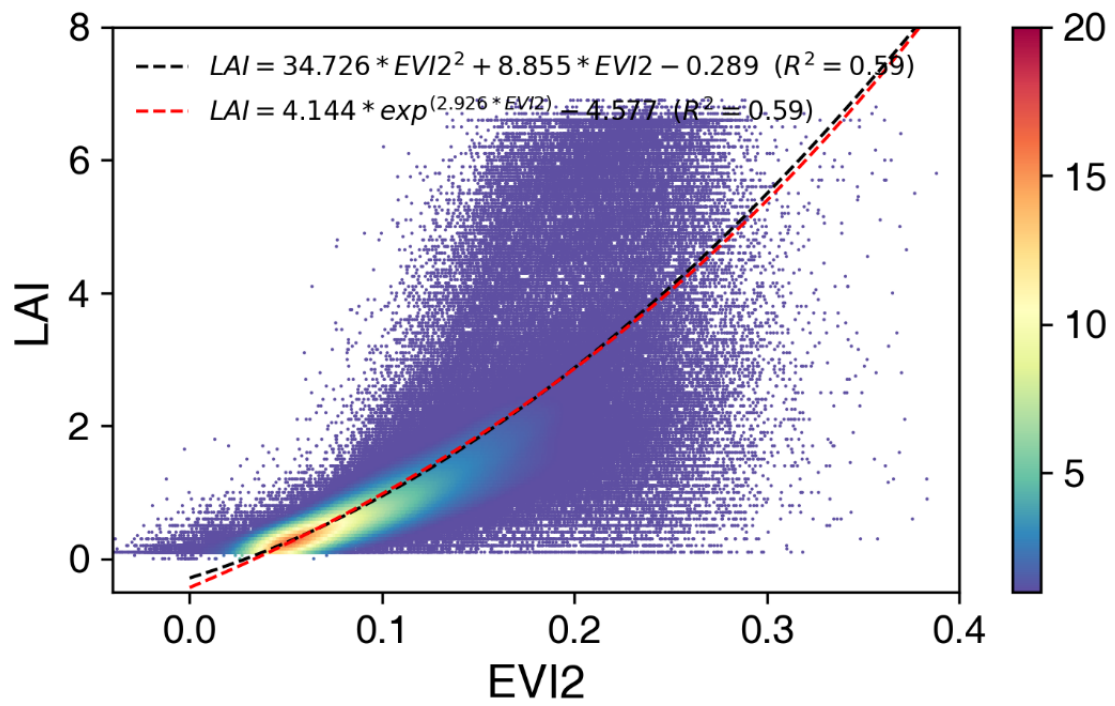

Fig. S9. The nonlinear relationship between MODIS LAI and EVI2. 2,000 points for each biome type were randomly sampled and the LAI-EVI2 pairs with good quality per 8 days for these points were extracted from MODIS LAI and EVI2.

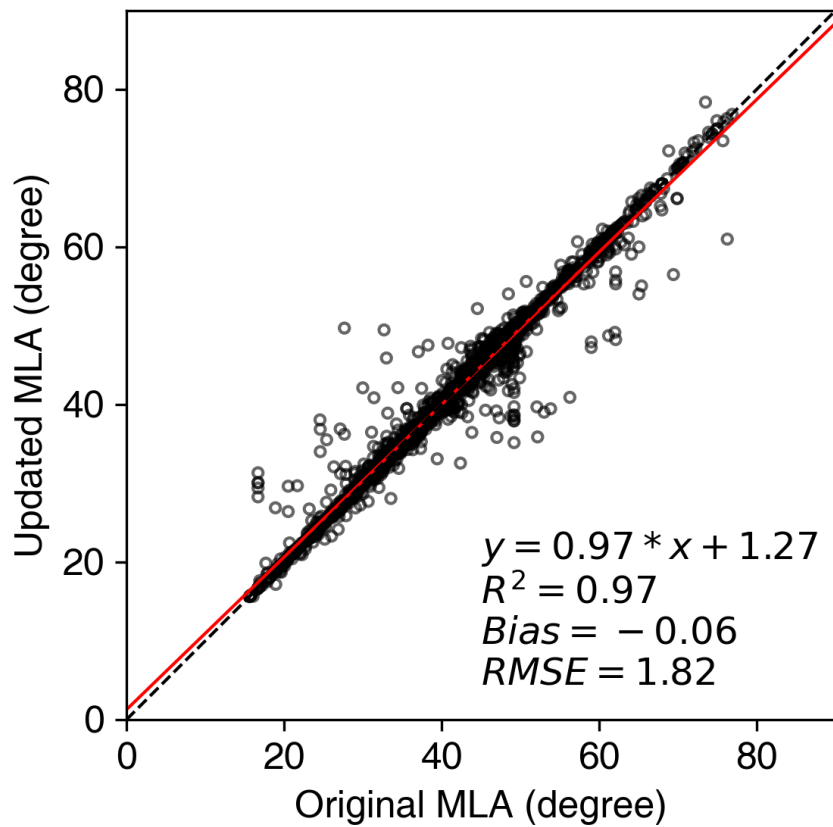

Fig. S10. The comparison between the updated samples using the LAI-EVI2 relationship and the original MLA samples using EVI2. The black dashed and red solid lines represent 1:1 and fitted lines, respectively.

Table S1. Global GBOV and DIRECT 2.1 field measurement sites used in this study. The GBOV biome type was determined from the maximum percentage of the land cover type within a 3 km × 3 km area centered on the site. The DIRECT 2.1 biome type was from the dataset. In the Continuity column, “Y” (“N”) indicates > 5 (otherwise) continuous measurements. For the biome-type acronyms, refer to Fig. 2.

| Site              | Code              | Latitude | Longitude | Biome | Year                                  | Project    | Continuity |
|-------------------|-------------------|----------|-----------|-------|---------------------------------------|------------|------------|
| 25de Mayo_Alfalfa | 25de Mayo_Alfalfa | -37.91   | -67.75    | CRO   | 2014                                  | DIRECT 2.1 | N          |
| 25de Mayo_Shurb   | 25de Mayo_Shurb   | -37.94   | -67.79    | SHR   | 2014                                  | DIRECT 2.1 | N          |
| AHSPECT-CON       | AHSPECT-CON       | 43.97    | 0.34      | CRO   | 2015                                  | DIRECT 2.1 | N          |
| AHSPECT-CRE       | AHSPECT-CRE       | 43.99    | -0.05     | CRO   | 2015                                  | DIRECT 2.1 | N          |
| AHSPECT-MTO       | AHSPECT-MTO       | 43.57    | 1.37      | CRO   | 2015                                  | DIRECT 2.1 | N          |
| AHSPECT-PEY       | AHSPECT-PEY       | 43.67    | 0.22      | CRO   | 2015                                  | DIRECT 2.1 | N          |
| AHSPECT-SAV       | AHSPECT-SAV       | 43.82    | 1.17      | CRO   | 2015                                  | DIRECT 2.1 | N          |
| AHSPECT-URG       | AHSPECT-URG       | 43.64    | -0.43     | CRO   | 2015                                  | DIRECT 2.1 | N          |
| Albufera          | Albufera          | 39.27    | -0.32     | CRO   | 2014                                  | DIRECT 2.1 | N          |
| Barrax            | Barrax            | 39.07    | -2.10     | CRO   | 2004, 2005, 2009,<br>2010, 2014, 2015 | DIRECT 2.1 | N          |
| Camerons          | Camerons          | -32.60   | 116.25    | EBF   | 2004                                  | DIRECT 2.1 | N          |
| Collelongo        | Collelongo        | 41.85    | 13.59     | DBF   | 2015                                  | DIRECT 2.1 | N          |
| Demmin            | Demmin            | 53.89    | 13.21     | CRO   | 2004                                  | DIRECT 2.1 | N          |
| Donga             | Donga             | 9.77     | 1.78      | GRA   | 2005                                  | DIRECT 2.1 | N          |
| Gnangara          | Gnangara          | -31.53   | 115.88    | DBF   | 2004                                  | DIRECT 2.1 | N          |
| Hailun            | Hailun            | 47.41    | 126.82    | CRO   | 2016                                  | DIRECT 2.1 | Y          |
| Honghe            | Honghe            | 47.65    | 133.52    | CRO   | 2012, 2019                            | DIRECT 2.1 | Y          |
| LaReina_Cordoba_1 | LaReina_Cordoba_1 | 37.82    | -4.86     | CRO   | 2014                                  | DIRECT 2.1 | N          |
| LaReina_Cordoba_2 | LaReina_Cordoba_2 | 37.79    | -4.83     | CRO   | 2014                                  | DIRECT 2.1 | N          |
| Larose            | Larose            | 45.38    | -75.22    | MF    | 2003                                  | DIRECT 2.1 | N          |

|                                   |                    |        |         |     |                  |            |   |
|-----------------------------------|--------------------|--------|---------|-----|------------------|------------|---|
| Liria                             | Liria              | 39.75  | -0.70   | ENF | 2017             | DIRECT 2.1 | N |
| Moncada                           | Moncada            | 39.52  | -0.39   | CRO | 2014, 2017       | DIRECT 2.1 | N |
| Muragua-Upper-Tana                | Muragua-Upper-Tana | -0.77  | 36.97   | CRO | 2016             | DIRECT 2.1 | N |
| Plan_De_Dieu                      | Plan_De_Dieu       | 44.20  | 4.95    | CRO | 2004             | DIRECT 2.1 | N |
| Pshenichne                        | PSH                | 50.08  | 30.23   | CRO | 2013, 2014, 2015 | DIRECT 2.1 | Y |
| SanFernando                       | SanFernando        | -34.72 | -71.00  | CRO | 2015             | DIRECT 2.1 | N |
| Sonian                            | Sonian             | 50.77  | 4.41    | MF  | 2004             | DIRECT 2.1 | N |
| SouthWest_1                       | SW1                | 43.55  | 1.09    | CRO | 2013             | DIRECT 2.1 | Y |
| SouthWest_2                       | SW2                | 43.45  | 1.15    | CRO | 2013             | DIRECT 2.1 | Y |
| Utiel                             | Utiel              | 39.58  | -1.26   | CRO | 2006             | DIRECT 2.1 | N |
| Wankama                           | Wankama            | 13.65  | 2.64    | GRA | 2005             | DIRECT 2.1 | N |
| Bartlett Experimental Forest      | BART               | 44.06  | -71.29  | MF  | 2014-2019        | GBOV       | Y |
| Blandy Experimental Farm          | BLAN               | 39.06  | -78.07  | PAS | 2015-2019        | GBOV       | Y |
| Central Plains Experimental Range | CPER               | 40.82  | -104.75 | GRA | 2014-2019        | GBOV       | Y |
| Disney Wilderness Preserve        | DELA               | 32.54  | -87.80  | WET | 2016-2019        | GBOV       | Y |
| Disney Wilderness Preserve        | DSNY               | 28.13  | -81.44  | WET | 2013-2019        | GBOV       | Y |
| Guanica Forest                    | GUAN               | 17.97  | -66.87  | EBF | 2015-2019        | GBOV       | Y |
| Harvard Forest                    | HARV               | 42.54  | -72.17  | MF  | 2014-2019        | GBOV       | Y |
| Jones Ecological Research Center  | JERC               | 31.19  | -84.47  | ENF | 2013-2019        | GBOV       | Y |
| Jornada                           | JORN               | 32.59  | -106.84 | SHR | 2015-2019        | GBOV       | Y |
| Lajas Experimental Station        | LAJA               | 18.02  | -67.08  | PAS | 2016-2019        | GBOV       | Y |
| Moab                              | MOAB               | 38.25  | -109.39 | SHR | 2015-2019        | GBOV       | Y |

|                                            |      |       |         |     |           |      |   |
|--------------------------------------------|------|-------|---------|-----|-----------|------|---|
| Niwot Ridge Mountain Research Station      | NIWO | 40.05 | -105.58 | SHR | 2015-2019 | GBOV | Y |
| North Sterling                             | STER | 40.46 | -103.03 | CRO | 2014-2019 | GBOV | Y |
| Oak Ridge                                  | ORNL | 35.96 | -84.28  | DBF | 2014-2019 | GBOV | Y |
| Onaqui                                     | ONAQ | 40.18 | -112.45 | SHR | 2014-2019 | GBOV | Y |
| Ordway-Swisher Biological Station          | OSBS | 29.68 | -82.01  | ENF | 2013-2019 | GBOV | Y |
| Santa Rita Experimental Range              | SRER | 31.91 | -110.84 | SHR | 2016-2019 | GBOV | Y |
| Smithsonian Conservation Biology Institute | SCBI | 38.89 | -78.14  | DBF | 2014-2019 | GBOV | Y |
| Smithsonian Environmental Research Center  | SERC | 38.89 | -76.56  | DBF | 2015-2019 | GBOV | Y |
| Steigerwaldt Land Services                 | STEI | 45.51 | -89.59  | MF  | 2015-2019 | GBOV | Y |
| Talladega National Forest                  | TALL | 32.95 | -87.39  | DBF | 2014-2019 | GBOV | Y |
| UNDERC                                     | UNDE | 46.23 | -89.54  | WET | 2014-2019 | GBOV | Y |
| Woodworth                                  | WOOD | 47.13 | -99.24  | GRA | 2014-2019 | GBOV | Y |

Table S2. Typical mean inclination angle (MLA) for different crop types. STD is the standard deviation.

| Crop type  | MLA (°) | STD (°) | Crop type   | MLA (°) | STD (°) |
|------------|---------|---------|-------------|---------|---------|
| Barley     | 51.60   | —       | Coffee      | 39.10   | —       |
| Cotton     | 42.70   | 2.40    | Cucumber    | 32.70   | —       |
| Faba bean  | 27.10   | —       | Horse beans | 38.85   | 4.55    |
| Lucerne    | 48.10   | —       | Lupin       | 17.60   | —       |
| Maize      | 54.01   | 14.42   | Oats        | 63.20   | —       |
| Potato     | 35.78   | 4.80    | Rape        | 36.85   | 4.27    |
| Rice       | 66.67   | 5.12    | Sesame      | 40.12   | —       |
| Sorghum    | 59.70   | 12.73   | Soybean     | 53.66   | 8.55    |
| Sugar beet | 42.90   | 4.25    | Sunflower   | 36.15   | 5.19    |
| Tobacco    | 46.13   | 9.75    | Wheat       | 59.30   | 14.00   |

Table S3. Predefined leaf inclination angle values in the CLM5 model (Lawrence et al., 2019; Majasalmi and Bright, 2019). The mean leaf inclination angle (MLA) is computed from the inclination index ( $\chi_L$ ) ( $MLA = \arccos(\frac{1+\chi_L}{2})$ ). EBS: evergreen broadleaf shrub, DBS: deciduous broadleaf shrub. See Fig. 1 for other acronyms.

| Plant functional type                                                                                     | $\chi_L$ | MLA (°) |
|-----------------------------------------------------------------------------------------------------------|----------|---------|
| Temperate ENF, boreal ENF, boreal DNF, temperate EBS                                                      | 0.01     | 59.67   |
| Tropical EBF, temperate EBF                                                                               | 0.10     | 56.63   |
| Tropical DBF                                                                                              | 0.01     | 59.67   |
| Temperate and boreal DBF and DBS                                                                          | 0.25     | 51.32   |
| GRA, C3 crop                                                                                              | -0.30    | 69.51   |
| Temperate corn, spring wheat, temperate soybean, cotton, rice, sugarcane, tropical corn, tropical soybean | -0.50    | 75.52   |



## References

- Lawrence, D. M., Fisher, R. A., Koven, C. D., Oleson, K. W., Swenson, S. C., Bonan, G., Collier, N., Ghimire, B., Van Kampenhout, L., and Kennedy, D.: The Community Land Model version 5: Description of new features, benchmarking, and impact of forcing uncertainty, *Journal of Advances in Modeling Earth Systems*, 11, 4245-4287, 2019.
- Majasalmi, T. and Bright, R. M.: Evaluation of leaf-level optical properties employed in land surface models, *Geoscientific Model Development*, 12, 3923-3938, 10.5194/gmd-12-3923-2019, 2019.
- Nilson, T.: A theoretical analysis of the frequency of gaps in plant stands, *Agricultural meteorology*, 8, 25-38, 1971.
